# Supplementary material for: Enantioselective bioreductive preparation of chiral halohydrins employing two newly identified stereocomplementary reductases
Source: Royal Society of Chemistry journal article supplement (doi:10.1039/c4ra16779a), 2015-01-01
Supplement: c4ra16779a1.pdf [file c4ra16779a1.pdf]

# Supporting information

## Enantioselectively bioreductive preparation of chiral halohydrins employing two newly identified stererocomplementary reductases

Guo-chao Xu,<sup>1,2</sup> Hui-lei Yu,<sup>1,\*</sup> Yue-peng Shang,<sup>1</sup> Jian-he Xu<sup>1</sup>

<sup>1</sup> State Key Laboratory of Bioreactor Engineering, East China University of Science and Technology, and  
Shanghai Collaborative Innovation Center for Biomanufacturing Technology, Shanghai 200237, China.

<sup>2</sup> The Key Laboratory of Industrial Biotechnology, Ministry of Education, School of Biotechnology, Jiangnan  
University, Wuxi 214122, China.

\*Corresponding authors. E-mail: huileiyu@ecust.edu.cn; jianhexu@ecust.edu.cn.

|                                                                                                                    |    |
|--------------------------------------------------------------------------------------------------------------------|----|
| <b>Table S1</b> Typical sequence motifs of SDR and AKR superfamily found in <i>DhCR</i> and <i>CgCR</i> .....      | 2  |
| <b>Table S2</b> The secondary structure elements motif in 'classical' SDR, 'extended' SDR and <i>DhCR</i> .....    | 3  |
| <b>Table S3</b> Steady-state kinetic constants of stererocomplementary <i>DhCR</i> and <i>CgCR</i> .....           | 4  |
| <b>Table S4</b> Substrate specificities of stererocomplementary <i>DhCR</i> and <i>CgCR</i> .....                  | 5  |
| <b>Table S5</b> Concentrations of NAD <sup>+</sup> and NADP <sup>+</sup> in the fresh wet cells and dry cells..... | 6  |
| <b>Table S6</b> Optimization of <i>DhCR</i> and <i>CgCR</i> catalyzed asymmetric reduction of COBE.....            | 7  |
| <b>Table S7</b> Comparison of the characteristics of reported enzymes that produce optically active<br>CHBE.....   | 8  |
| <b>Figure S1</b> SDS-PAGE analysis of the purified <i>CgCR</i> and <i>DhCR</i> .....                               | 9  |
| <b>Figure S2</b> Effect of temperature and pH on the activity of <i>DhCR</i> and <i>CgCR</i> .....                 | 10 |
| <b>Figure S4</b> Calibration curves of oxidized cofactors.....                                                     | 11 |
| <b>Figure S5</b> Multiple sequences alignment of <i>DhCR</i> with several SDR members.....                         | 12 |
| <b>Figure S6</b> Multiple sequences alignment of <i>CgCR</i> with several AKR members.....                         | 13 |
| <b>Figure S7</b> GC spectra of CHBE.....                                                                           | 14 |
| <b>Reference</b> .....                                                                                             | 15 |

**Table S1** Typical sequence motifs of SDR and AKR superfamily found in *DhCR* and *CgCR*.

| <b>Typical sequence motifs of SDR found in <i>DhCR</i><sup>a</sup></b> |           |                                                                |                                |                                |
|------------------------------------------------------------------------|-----------|----------------------------------------------------------------|--------------------------------|--------------------------------|
| <b>Sequence motif</b>                                                  | <b>of</b> | <b>Function</b>                                                | <b>Position in SDR</b>         | <b>Position in <i>DhCR</i></b> |
| (T)Gxx(x)Gx(G)xA <sup>b</sup>                                          |           | Coenzyme binding region, maintenance of central $\beta$ -sheet | 12–21                          | 40–49                          |
| D                                                                      |           | Stabilization of adenine ring pocket, weak binding to coenzyme | 60                             | 94                             |
| S, YxxxK                                                               |           | Catalytic triad                                                | 138, 151–155                   | 172, 187–191                   |
| N                                                                      |           | Connection of substrate binding loop and active site           | 179                            | 212                            |
| PG                                                                     |           | Reaction direction                                             | 183–184                        | 216–217                        |
| T                                                                      |           | H-bonding to carboxamide of nicotinamide ring                  | 188                            | 221                            |
| <b>Typical sequence motifs of AKR found in <i>CgCR</i><sup>c</sup></b> |           |                                                                |                                |                                |
| <b>Sequence motif</b>                                                  | <b>of</b> | <b>Function</b>                                                | <b>Position in AKR</b>         | <b>Position in <i>CgCR</i></b> |
| G, G, G, D, P, G, P                                                    |           | Stabilization of the barrel core                               | 20, 22, 45, 112, 119, 164, 186 | 23, 25, 45, 106, 113, 165, 187 |
| A, W                                                                   |           | Substrate binding                                              | 52, 118                        | 52, 112                        |
| D, Y, K, H                                                             |           | Catalytic tetrad                                               | 50, 55, 84, 117                | 50, 55, 80, 111                |
| N, Q                                                                   |           | H-bonding with carboxamide moiety of the cofactor              | 167, 190                       | 168, 191                       |
| T, D                                                                   |           | Interaction with nicotinamide ribose ring of the cofactor      | 23, 50                         | 26, 50                         |
| S, R                                                                   |           | H-bonding to adenosine 2'-monophosphate of the cofactor        | 271, 276                       | 263, 268                       |

<sup>a</sup> (Positions refers to residue numbering as in  $3\beta/17\beta$ -hydroxysteroid dehydrogenases (PDB: 1HXH); <sup>b</sup> x represents any amino acids; <sup>c</sup> Positions refers to residue numbering as in  $3\alpha$ -hydroxysteroid dehydrogenases (PDB: 1RAL).

**Table S2** The secondary structure elements motif in 'classical' SDR, 'extended' SDR and *DhCR*.

| Secondary structure element | Conserved SDR motifs                                   |                                           |                               | Function                                              | Position in <i>DhCR</i> |
|-----------------------------|--------------------------------------------------------|-------------------------------------------|-------------------------------|-------------------------------------------------------|-------------------------|
|                             | Classical                                              | Extended                                  | <i>DhCR</i>                   |                                                       |                         |
| $\beta 1+\alpha 1$          | <u>T</u> Gxxx <u>G</u> h <u>G</u>                      | <u>T</u> Gxx <u>G</u> h <u>a</u> <u>G</u> | <u>T</u> GSS <u>G</u> GIG     | Coenzyme binding region                               | $\beta 1+\alpha 1$      |
| $\beta 3+\alpha 3$          | <u>D</u> h[x[cp]                                       | <u>D</u> hxD                              | <u>D</u> PE <u>D</u>          | Adenine ring binding of coenzyme                      | $\beta 3+\alpha 3$      |
| $\beta 4$                   | <u>G</u> xh <u>D</u> hh <u>h</u> NNAGh                 | [ <u>D</u> E]xhh <u>H</u> XAA             | <u>G</u> TID <u>V</u> FVANAGV | Structural role in stabilizing central $\beta$ -sheet | $\beta 4$               |
| $\beta 5$                   | <u>G</u> xhhx <u>h</u> SS <u>h</u>                     | hhx <u>SS</u> xx <u>h</u> a <u>G</u>      | GSLVLTASMSG                   | Part of active site                                   | $\beta 5$               |
| $\alpha 5$                  | <u>Y</u> x[AS][ST] <u>K</u>                            | <u>P</u> <u>Y</u> xx[AS] <u>K</u> xx<br>h | PYNAAKAGV                     | Part of active site                                   | $\alpha 6$              |
| $\beta 6$                   | <u>H</u> [KR]h[NS]x <u>h</u> <u>P</u> <u>G</u><br>xxxT | h[KR]xx <u>N</u> <u>G</u> <u>P</u>        | ARVNTISPGYIA<br>T             | Structural role, reaction direction                   | $\beta 6$               |

\*In the motifs, 'a' denotes an aromatic residues, 'c' a charged residue, 'h' a hydrophobic residue, 'p' a polar residue and 'x' any residue. Conserved amino acids are underlined. Alternative amino acids at a motif position are given within brackets. The secondary elements of classical and extended SDR are based on 3 $\alpha$ /20 $\beta$ -hydroxysteroid dehydrogenase (PDB: 2HSD).

**Table S3** Steady-state kinetic constants of stereocomplementary *DhCR* and *CgCR*.

| Substrate                                                          | <i>DhCR</i> |               | <i>CgCR</i> |               |
|--------------------------------------------------------------------|-------------|---------------|-------------|---------------|
|                                                                    | COBE        | NADPH         | COBE        | NADPH         |
| $K_M$ /mM                                                          | 1.30 ± 0.01 | 0.035 ± 0.001 | 3.70 ± 0.08 | 0.028 ± 0.003 |
| $V_{max}$ / $\mu\text{mol}\cdot\text{min}^{-1}\cdot\text{mg}^{-1}$ | 29.7 ± 0.3  | –             | 42.1 ± 0.6  | –             |
| $k_{cat}$ / $\text{s}^{-1}$                                        | 16.6 ± 0.3  | –             | 27.9 ± 0.4  | –             |
| $k_{cat}/K_M$ $\text{s}^{-1}\cdot\text{mM}^{-1}$                   | 12.8        | –             | 7.55        | –             |

**Table S4** Substrate specificities of stereocomplementary DhCR and CgCR.

| Substrate | DhCR                                  |                           | CgCR                                  |              |
|-----------|---------------------------------------|---------------------------|---------------------------------------|--------------|
|           | Specific activity /U·mg <sup>-1</sup> | ee % / (R/S)              | Specific activity /U·mg <sup>-1</sup> | ee % / (R/S) |
| 1         | 0.16                                  | >99 (R)                   | 0.32                                  | 92 (S)       |
| 2         | 0.11                                  | >99 (R)                   | 0.12                                  | 97 (S)       |
| 3         | 0.075                                 | >99 (R)                   | 0.17                                  | 86 (S)       |
| 4         | 2.1                                   | >99 (S)                   | 0.58                                  | 98 (R)       |
| 5         | 6.9                                   | >99 (S)                   | 2.0                                   | 56 (R)       |
| 6         | 0.06                                  | >99 (R)                   | 0.19                                  | >99 (S)      |
| 7         | <0.01                                 | <i>n. d.</i> <sup>a</sup> | 1.0                                   | >99 (S)      |
| 8         | 5.3                                   | >99 (R)                   | 3.2                                   | 96 (S)       |
| 9         | 22                                    | >99 (S)                   | 2.6                                   | >99 (R)      |
| 10        | 0.35                                  | >99 (S)                   | 2.4                                   | >99 (R)      |
| 11        | 33                                    | >99 (S)                   | 2.9                                   | >99 (R)      |
| 12        | 0.37                                  | >99 (R)                   | 0.28                                  | >99 (S)      |
| 13        | 0.087                                 | >99 (R)                   | 0.50                                  | >99 (S)      |
| 14        | 0.024                                 | >99 (R)                   | 0.034                                 | >99 (S)      |
| 15        | 1.1                                   | >99 (R)                   | 0.15                                  | >99 (S)      |
| 16        | 1.4                                   | >99 (R)                   | 0.12                                  | >99 (S)      |
| 17        | 0.52                                  | >99 (R)                   | 0.02                                  | >99 (S)      |
| 18        | 0.2                                   | >99 (R)                   | 0.01                                  | >99 (S)      |
| 19        | 3.0                                   | >99 (R)                   | 0.38                                  | >99 (S)      |
| 20        | 0.11                                  | >99 (R)                   | 0.56                                  | >99 (S)      |
| 21        | 0.1                                   | >99 (R)                   | 0.64                                  | >99 (S)      |
| 22        | 13                                    | >99 (S)                   | 8.0                                   | >99 (R)      |
| 23        | 0.48                                  | >99 (S)                   | 3.8                                   | >99 (R)      |
| 24        | 2.7                                   | >99 (R)                   | 9.3                                   | >99 (S)      |
| 25        | 3.6                                   | >99 (R)                   | 19                                    | >99 (S)      |

<sup>a</sup> *n. d.*: no product was detected.

**Table S5** Concentrations of NAD<sup>+</sup> and NADP<sup>+</sup> in the fresh wet cells and dry cells.

| <b>Cell</b>     | <b>NAD<sup>+</sup></b><br><b>/μmol·g<sup>-1</sup></b> | <b>NADP<sup>+</sup></b><br><b>/μmol·g<sup>-1</sup></b> |
|-----------------|-------------------------------------------------------|--------------------------------------------------------|
| Fresh wet cells | 0.44 ± 0.02                                           | 1.03 ± 0.06                                            |
| Dry cells       | 0.62 ± 0.02                                           | 1.86 ± 0.13                                            |

**Table S6** Optimization of *DhCR* and *CgCR* catalyzed asymmetric reduction of COBE.

| Catalyst    |                      | Substrate        |     |                      | S/C                | Time | Conv.                   | % ee    |
|-------------|----------------------|------------------|-----|----------------------|--------------------|------|-------------------------|---------|
| Name        | [g·L <sup>-1</sup> ] | [g]              | [M] | [g·L <sup>-1</sup> ] | ratio <sup>b</sup> | [h]  | [%]                     | /(R/S)  |
| <i>DhCR</i> | 10                   | 0.33             | 0.2 | 33                   | 3.3                | 6    | >99                     | >99 (S) |
|             | 20                   | 0.83             | 0.5 | 83                   | 4.15               | 8    | >99                     | >99 (S) |
|             | 20                   | 1.65             | 1.0 | 165                  | 8.25               | 12   | >99                     | >99 (S) |
|             | 20                   | 3.30             | 2.0 | 330                  | 16.5               | 24   | >99                     | >99 (S) |
|             | 20                   | 330 <sup>a</sup> | 2.0 | 330                  | 16.5               | 24   | >99 (92.5) <sup>c</sup> | >99 (S) |
| <i>CgCR</i> | 5                    | 0.33             | 0.2 | 33                   | 6.6                | 6    | >99                     | >99 (R) |
|             | 10                   | 0.86             | 0.5 | 83                   | 8.3                | 6    | >99                     | >99 (R) |
|             | 10                   | 1.65             | 1.0 | 165                  | 16.5               | 12   | >99                     | >99 (R) |
|             | 10                   | 3.30             | 2.0 | 330                  | 33                 | 24   | >99                     | >99 (R) |
|             | 10                   | 330 <sup>a</sup> | 2.0 | 330                  | 33                 | 24   | >99 (93.0) <sup>c</sup> | >99 (R) |

<sup>a</sup> Reactions were carried out at 1 L scale with mechanical agitation. <sup>b</sup> S/C ratio: substrate to catalyst ratio. <sup>c</sup> Numbers in the bracket were isolation yield.

**Table S7** Comparison of the characteristics of reported enzymes that produce optically active CHBE.

| Enzyme | Family              | $K_M$<br>[mM] | Concn<br>[g·L <sup>-1</sup> ] | Cofacto<br>r [mM] | Time<br>[h] | Yield<br>[%] | ee [%]<br>/(R/S) | S.T.Y.<br>[g·L <sup>-1</sup> ·d <sup>-1</sup> ] | TTN of<br>cofactor |         |
|--------|---------------------|---------------|-------------------------------|-------------------|-------------|--------------|------------------|-------------------------------------------------|--------------------|---------|
| 1      | S1 <sup>a</sup>     | SDR           | 4.6                           | 300               | 0.081       | 13           | 96               | 100 (S)                                         | 538                | 21,550  |
|        |                     |               |                               | 500 <sup>m</sup>  | 0.167       | 34           | 85               | 100 (S)                                         | 304                | 21,600  |
| 2      | ScCR <sup>b</sup>   | SDR           | 0.49                          | 600               | 0.3         | 22           | 92               | >99 (S)                                         | 609                | 12,100  |
| 3      | CmMR <sup>c</sup>   | MDR           | –                             | 300               | 0.13        | 36           | 92               | 91.6 (S)                                        | 186                | 12,900  |
| 4      | CmCR <sup>d</sup>   | SDR           | –                             | 493.8             | 0.3         | 14           | 99               | >99 (S)                                         | –                  | 10,000  |
| 5      | PsCRI <sup>e</sup>  | SDR           | 4.9                           | 230               | 0.10        | 30           | 90               | 99 (S)                                          | 168                | 12,600  |
| 6      | PsCRII <sup>f</sup> | SDR           | 3.3                           | 250               | 0.10        | 30           | 91               | 99 (S)                                          | 184                | 13,980  |
| 7      | CPE <sup>g</sup>    | SDR           | 0.19                          | 3.3               | 0.25        | 20           | 91               | >99 (S)                                         | 3.65               | –       |
| 8      | DhCR <sup>h</sup>   | SDR           | 1.3                           | 660 <sup>n</sup>  | 0           | 24           | 92.5             | >99 (S)                                         | 305                | 53,800  |
| 9      | SsCR <sup>i</sup>   | AKR           | 3.8                           | 300               | 0.13        | 16           | 94               | 91.7 (R)                                        | 419                | 13,500  |
| 10     | YueD <sup>j</sup>   | SDR           | 0.70                          | 215 <sup>n</sup>  | 1           | 5            | 92               | 99.6 (R)                                        | 961                | 1196    |
| 11     | CgKR1 <sup>k</sup>  | MDR           | –                             | 330               | 0           | 24           | 89               | 96.5 (R)                                        | 297                | –       |
| 12     | CgCR <sup>l</sup>   | AKR           | 3.7                           | 660 <sup>n</sup>  | 0           | 12           | 93.0             | >99 (R)                                         | 614                | 108,000 |

<sup>a</sup> *Candida magnolia* (Kizaki et al., 2001), <sup>b</sup> *Streptomyces coelicolor* (Wang et al., 2011), <sup>c</sup> *C. macedoniensis* (Kataoka et al., 2006), <sup>d</sup> *C. magnolia* (He et al., 2014), <sup>e</sup> *Pichia stipites* (Ye et al., 2009), <sup>f</sup> *P. stipites* (Ye et al., 2010), <sup>g</sup> *Candida parapsilosis* (Wang et al., 2012), <sup>h</sup> *D. hansenii* (This work), <sup>i</sup> *Sporobolomyces salmonicolor* (Kataoka et al., 1999), <sup>j</sup> *Bacillus subtilis* (Ni et al., 2011), <sup>k</sup> *Candida glabrata* (Ma et al., 2012), <sup>l</sup> *C. glabrata* (This work), <sup>m</sup> Reaction was carried out in n-butyl acetate/aqueous (1/1) phase (Kizaki et al., 2001), <sup>n</sup> Reactions were carried out in toluene/aqueous (1/1) phase (Wang et al., 2011).



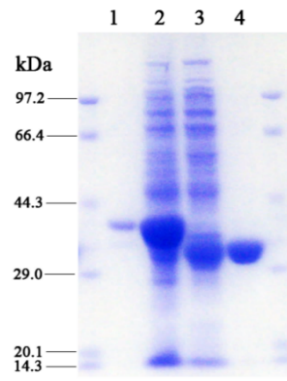

**Figure S1** SDS-PAGE analysis of the purified *CgCR* and *DhCR*. Lane 1: purified *CgCR*; Lane 2: crude extract of *CgCR*; Lane 3: crude extract of *DhCR*; Lane 4: purified *DhCR*.

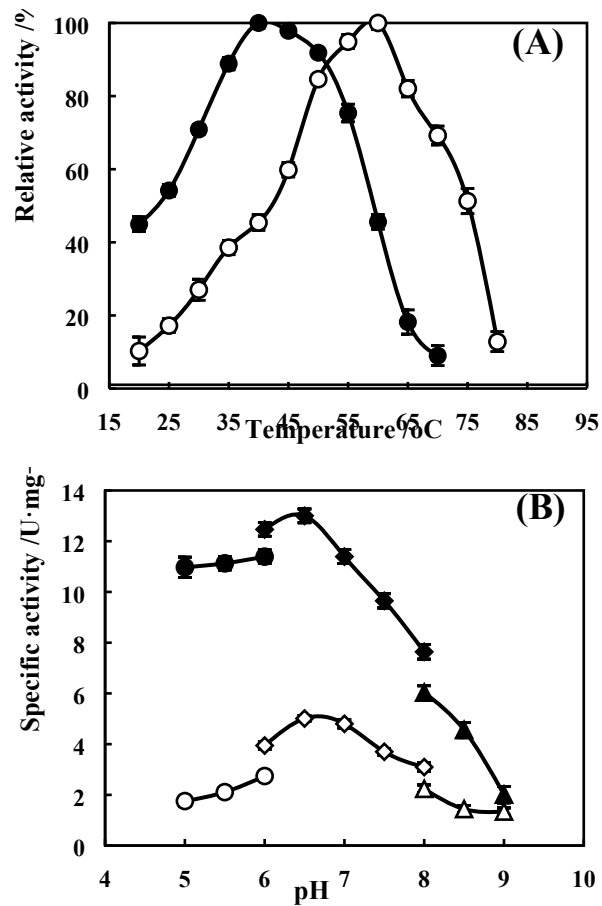

**Figure S2** Effect of temperature and pH on the activity of *DhCR* and *CgCR*. (A) Temperature-profile of *DhCR* (●) and *CgCR* (○); (B) pH-profile of *DhCR* (solid symbols) and *CgCR* (Hollow symbols), Cycle: Citrate buffer (pH 5.0–6.0), Diamond: Phosphate sodium buffer (pH 6.0–8.0), and Triangle: Glycine-NaOH buffer (pH 8.0–9.0).

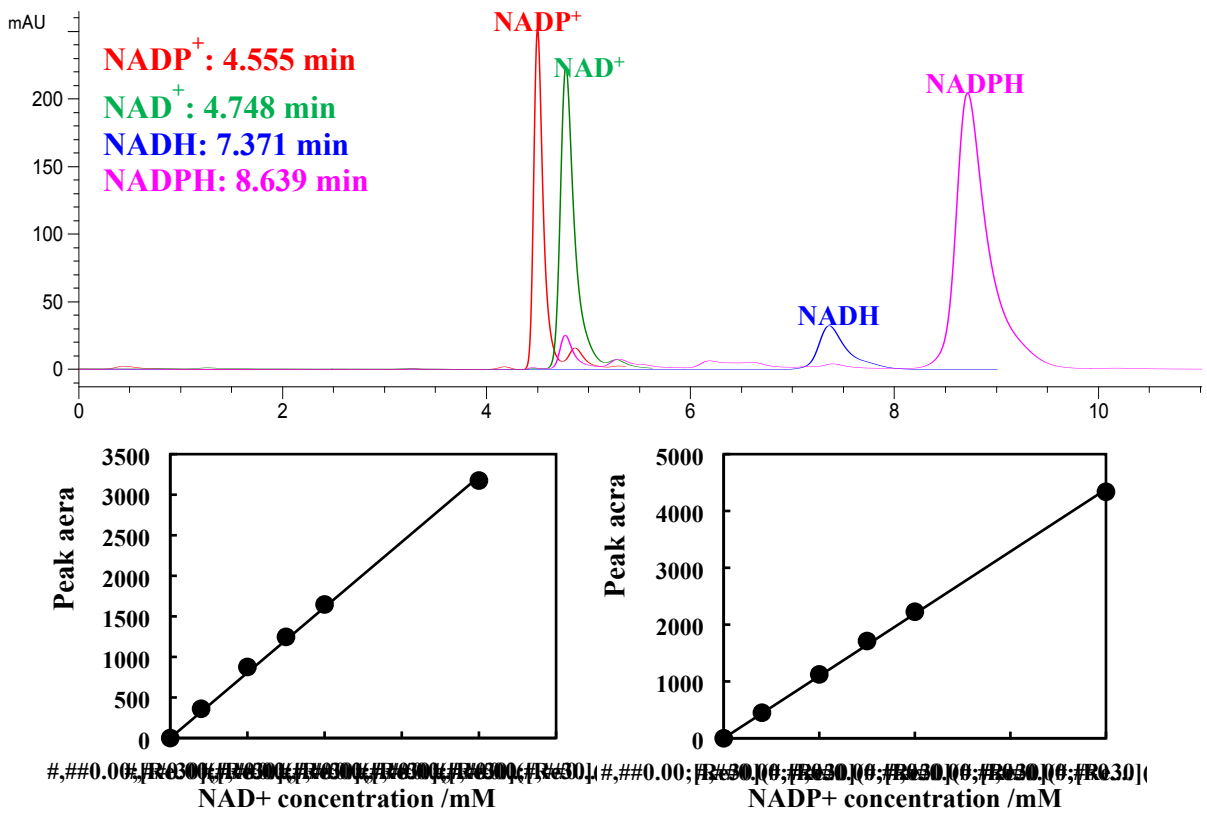

**Figure S4** Calibration curves of oxidized cofactors.

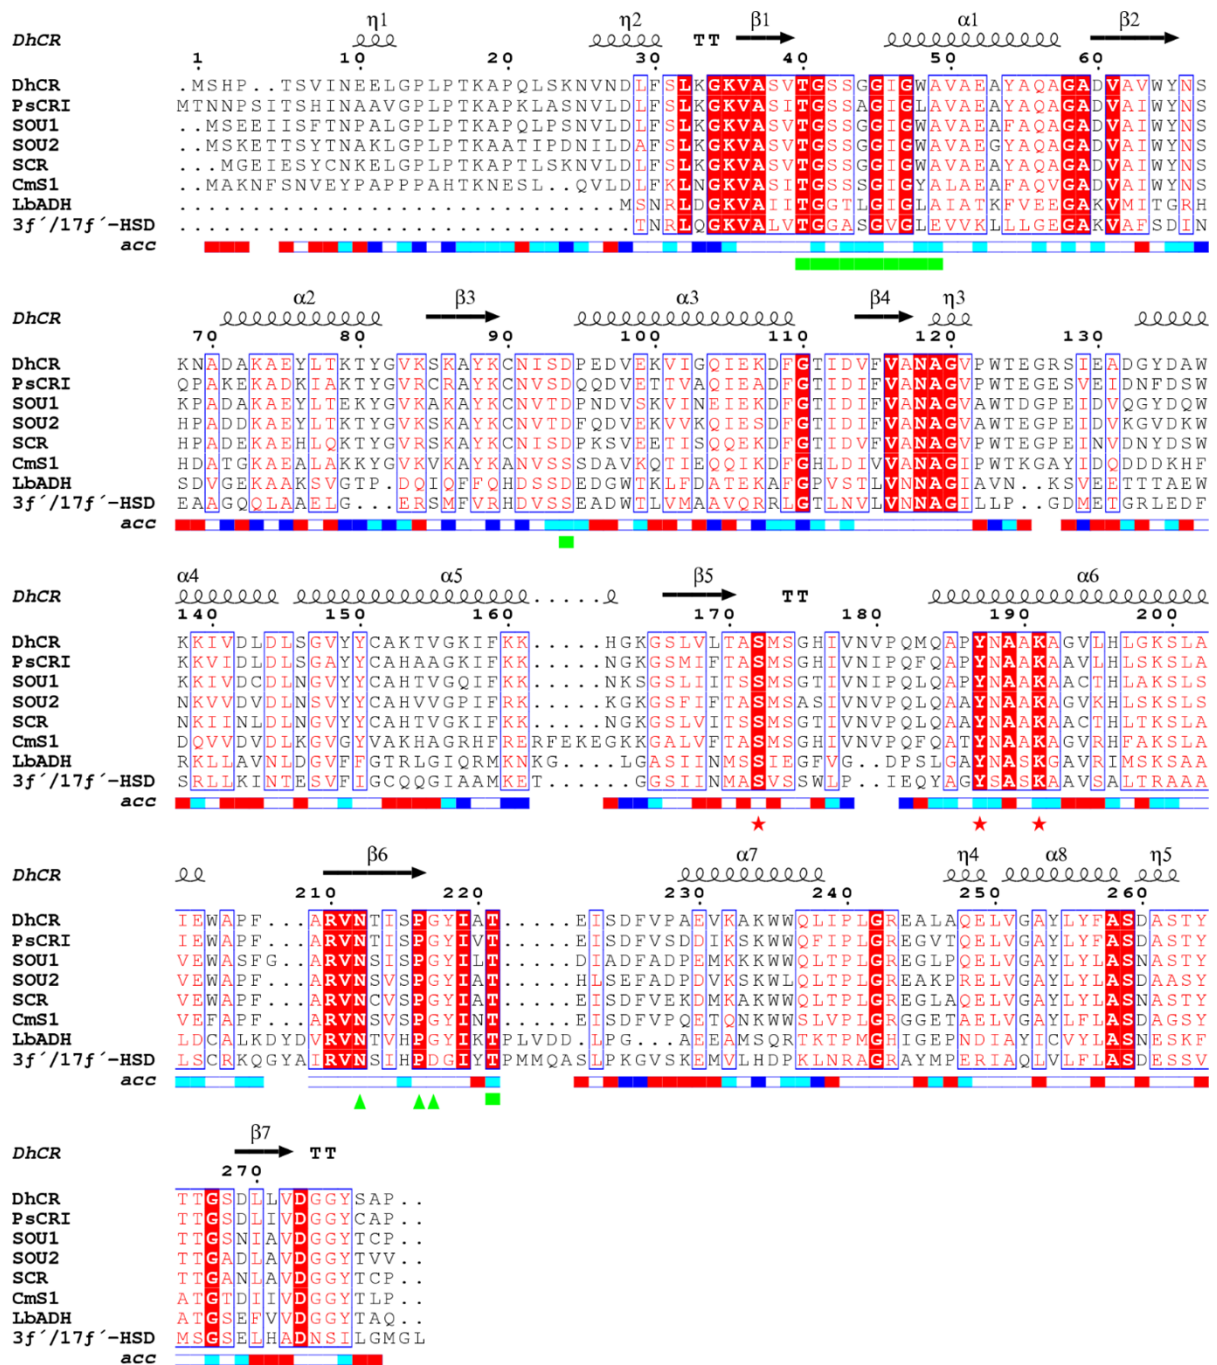

**Figure S5** Multiple sequences alignment of *DhCR* with several SDR members. PsCRI (*Phichia stipites* ATCC58785, A3GF07), SOU1 (*Candida albicans* SC5314, P87219), SOU2 (*Candida albicans* SC5314, P87218), SCR (*Candida parapsilosis*, D5G304), CmS1 (*Candida magnolia*, Q9C4B3), LbADH (*Lactobacillus brevis*, Q84EX5), 3β/17β-hydroxysteroid dehydrogenase, (*Comamonas testosterone* ATCC11996, H1RW42). ★: catalytic residues; ■: cofactor binding residues; ▲: substrate binding residues.

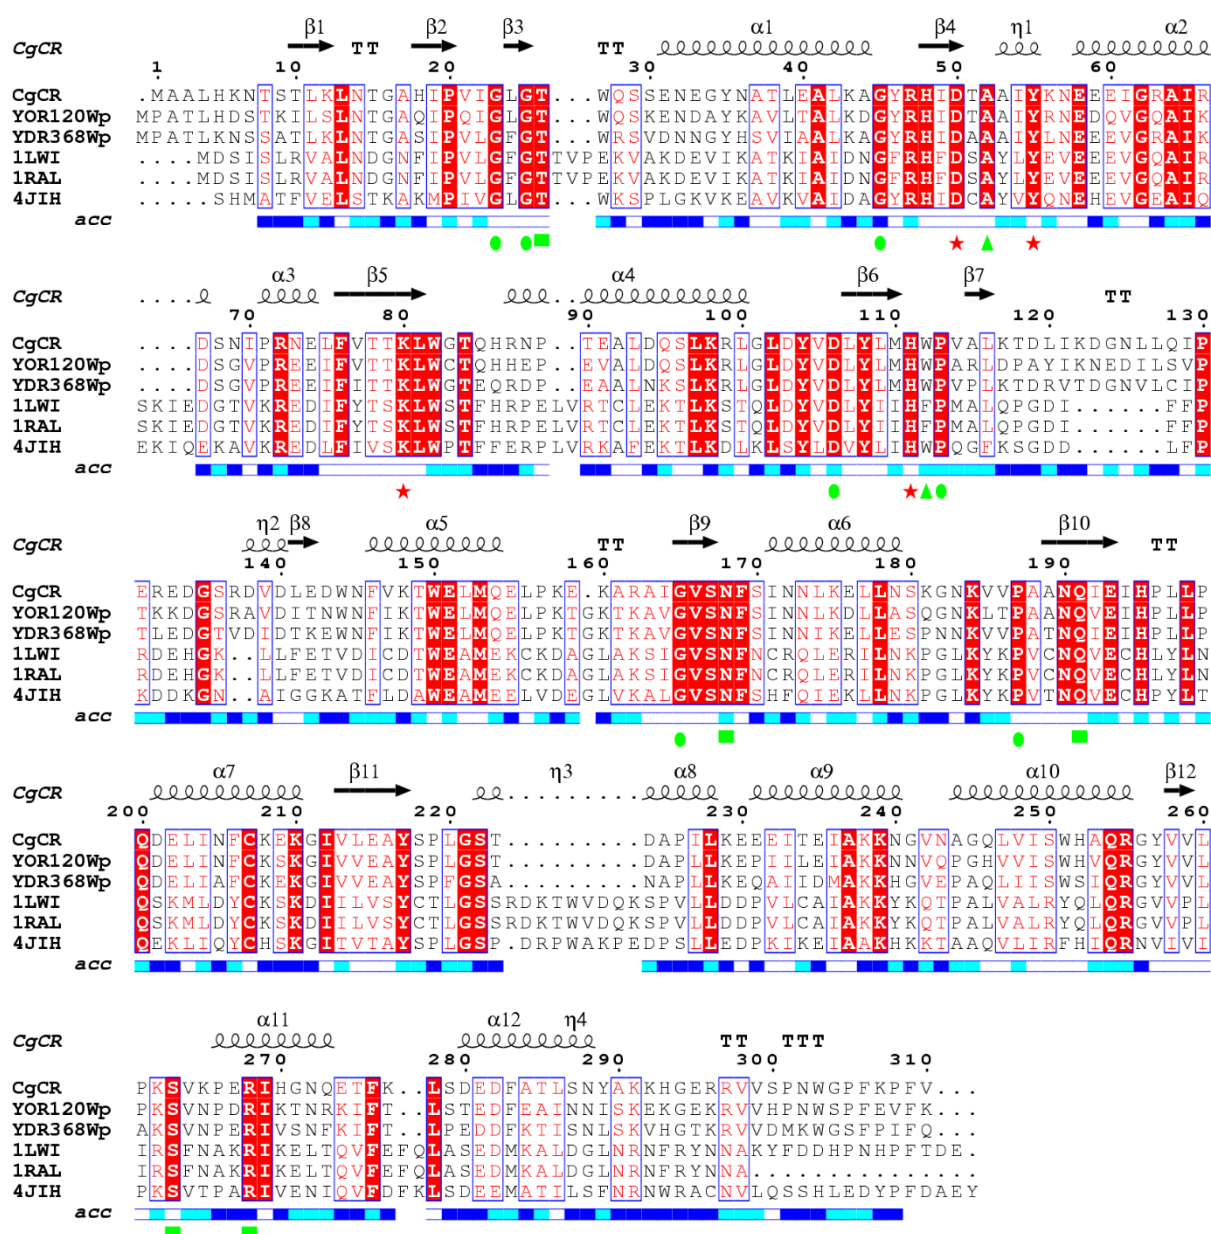

**Figure S6** Multiple sequences alignment of CgCR with several AKR members. YOR120Wp (*Saccharomyces cerevisiae* AWRI1631, B5VS12), YOR368Wp (*Saccharomyces cerevisiae* AWRI1631, B5VSP3), 1LWI (3 $\alpha$ -hydroxysteroid dehydrogenase, *Rattus norvegicus*, P23457), 1RAL (3 $\alpha$ -hydroxysteroid dehydrogenase, *Rattus norvegicus*, Q91WT7), 4JIH (Aldo-keto reductase AKR1B10, *Gorilla*, G3S8S6). ★: catalytic residues; ●: structure-stabilizing residues; ■: cofactor-binding residues; ▲: substrate-binding residues.

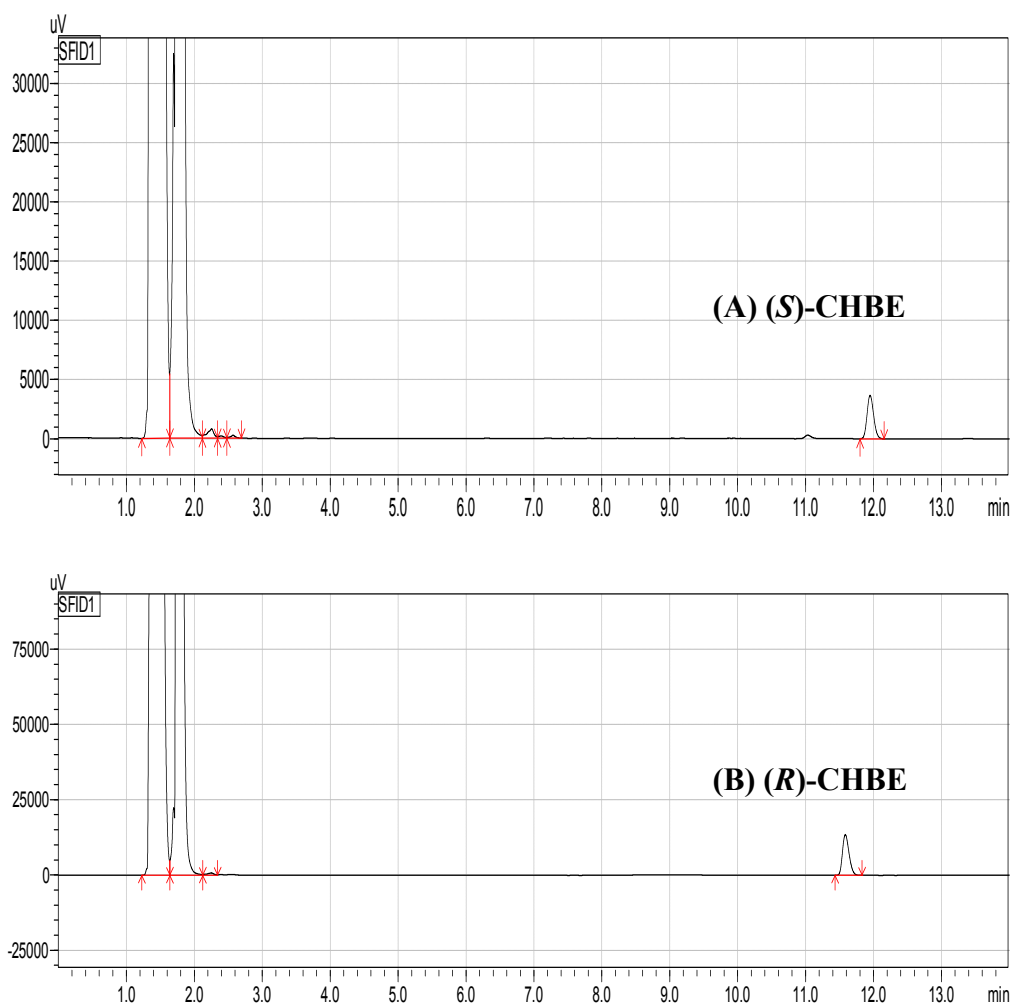

**Figure S7** GC spectra of CHBE. (A) Ethylated (*S*)-CHBE produced by *DhCR*; (B) Ethylated (*R*)-CHBE produced by *CgCR*.

## Reference

- Kizaki, N., Yasohara, Y., Hasegawa, J. Wada, M., Kataoka, M., Shimizu, S., 2001. Synthesis of optically pure ethyl (S)-4-chloro-3-hydroxybutanoate by *Escherichia coli* transformant cells coexpressing the carbonyl reductase and glucose dehydrogenase genes. *Appl. Microbiol. Biotechnol.* 55, 590–595.
- Kataoka, M., Hoshino-Hasegawa, A., Thiwthong, R., Higuchi, N., Ishige, T., Shimizu, S., 2006. Gene cloning of an NADPH-dependent menadione reductase from *Candida macedoniensis*, and its application to chiral alcohol production. *Enzyme Microb. Technol.* 38, 944–951.
- He, Y.C., Tao, Z.C., Zhang, X., Yang, Z.X., Xu, J.H., 2014. Highly efficient synthesis of ethyl (S)-4-chloro-3-hydroxybutanoate and its derivatives by a robust NADH-dependent reductase from *E. coli* CCZU-K14. *Bioresour. Technol.* 161, 461–464.
- Ye, Q., Yan, M., Yao, Z., Xu, L., Cao, H., Li, Z.J., Chen, Y., Li, S.Y., Bai, J.X., Xiong, J., Ying, H.J., Ouyang, P.K., 2009. A new member of the short-chain dehydrogenase/reductases superfamily: purification, characterization and substrate specificity of a recombinant carbonyl reductase from *Pichia stipites*. *Bioresour. Technol.* 100, 6022–6027.
- Ye, Q., Cao, H., Mi, L., Yan, M., Wang, Y., He, Q.T., Li, J., Xu, L., Chen, Y.J., Xiong, J., Ouyang, P.K., Ying, H.J., 2010. Biosynthesis of (S)-4-chloro-3-hydroxybutanoate ethyl using *Escherichia coli* co-expressing a novel NADH-dependent carbonyl reductase and a glucose dehydrogenase. *Bioresour. Technol.* 101, 8911–8914.
- Wang, Q.Y., She, L.H., Ye, T.T., Cao, D., Chen, R., Pei, X.L., Xie, T., Li, Y., Gong, W.B., Yin, X.P., 2012. Overexpression and characterization of a novel (S)-specific extended short-chain dehydrogenase/reductase from *Candida parapsilosis*. *Bioresour. Technol.* 123, 690–694.
- Kataoka, M., Rohani, L.P., Yamamoto, K., Kawabata, H., Wada, M., Kita, K., Yanase, H., Shimizu, S., 1999. Stereoselective reduction of ethyl 4-chloro-3-oxobutanoate by *Escherichia coli* transformant cells coexpressing the aldehyde reductase and glucose dehydrogenase genes. *Appl. Microbiol. Biotechnol.* 41, 486–490.
- Ni, Y., Li, C.X., Wang, L.J., Zhang, J., Xu, J.H., 2011. Highly stereoselective reduction of prochiral ketones by a bacterial reductase coupled with cofactor regeneration. *Org. Biomol. Chem.* 9, 5463–5468.
- Ma, H.M., Yang, L.L., Ni, Y., Zhang, J., Li, C.X., Zheng, G.W., Yang, H.Y., Xu, J.H., 2012. Stereospecific reduction of methyl o-chlorobenzoylformate at 300 g·L<sup>-1</sup> without addition cofactor using a carbonyl reductase mined from *Candida glabrata*. *Adv. Synth. Catal.* 354, 1765–1772.
- Kizaki, N., Yasohara, Y., Hasegawa, J. Wada, M., Kataoka, M., Shimizu, S., 2001. Synthesis of optically pure ethyl (S)-4-chloro-3-hydroxybutanoate by *Escherichia*

*coli* transformant cells coexpressing the carbonyl reductase and glucose dehydrogenase genes. Appl. Microbiol. Biotechnol. 55, 590–595.
